# Supplementary material for: The Influence of Personality Traits on Specific Coping Styles and the Development of Posttraumatic Stress Symptoms following Acute Coronary Syndrome: A Cluster Analytic Approach
Source: MDPI journal article supplement (doi:10.3390/psych4040057), 2022-10-10
Supplement: s1 [file s1]

# Supplementary Materials: The Influence of Personality Traits on Specific Coping Styles and the Development of Posttraumatic Stress Symptoms following Acute Coronary Syndrome: A Cluster Analytic Approach

Mary Princip, Roland von Känel, Claudia Hackl-Zuccarella, Rebecca E. Meister-Langraf, Hansjörg Znoj, Jean-Paul Schmid, Jürgen Barth, Ulrich Schnyder, Lucia Jimenez-Gonzalo and Katharina Ledermann

## Cluster analysis

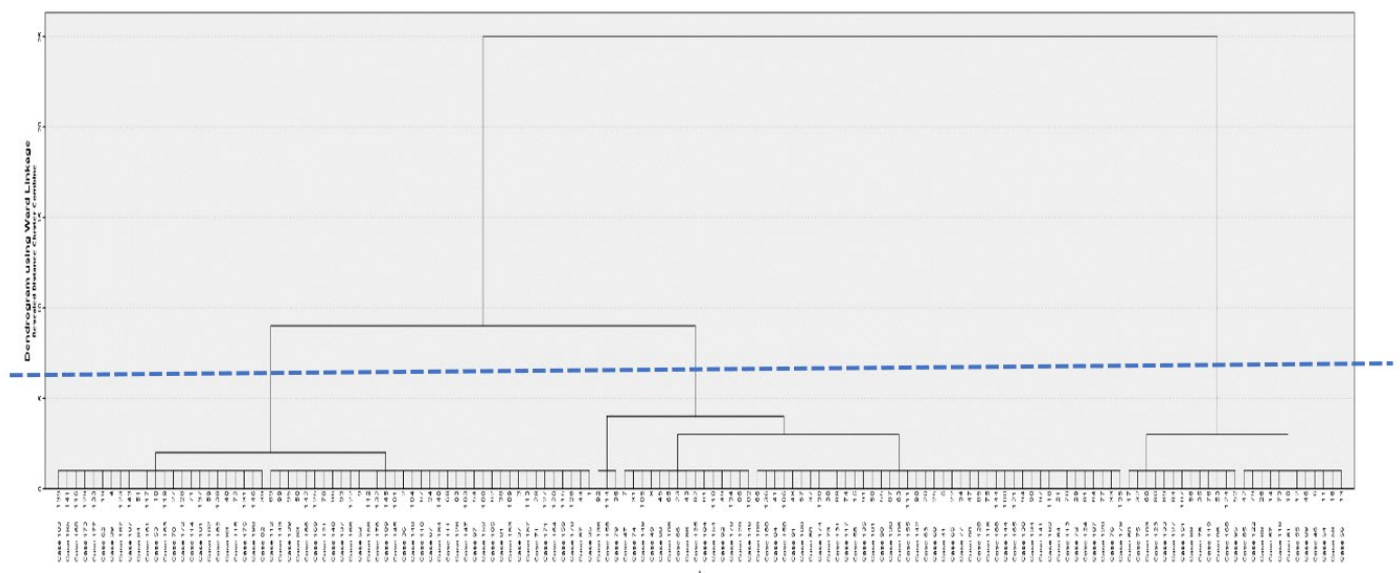

**Figure S1.** Cluster dendrogram using Ward method. Dashed line identifies the 3-cluster solution.

## Bivariate associations between the assessed variables

**Table S1.** Bivariate correlations (associations) between variables

| Bivariate correlations (associations) between variables |        |        |        |       |        |       |       |
|---------------------------------------------------------|--------|--------|--------|-------|--------|-------|-------|
|                                                         | 1      | 2      | 3      | 4     | 5      | 6     | 7     |
| 1. Type D personality                                   |        |        |        |       |        |       |       |
| 2. Alexithymia                                          | .54**  |        |        |       |        |       |       |
| 3. Resilience                                           | -.46** | -.48** |        |       |        |       |       |
| 4. Emotion oriented coping                              | .53**  | .53**  | -.37** |       |        |       |       |
| 5. Task oriented coping                                 | -.20*  | -.29** | .53**  | -.09  |        |       |       |
| 6. Avoidant coping                                      | -.08   | -.01   | .29**  | .00   | .34**  |       |       |
| 7. PTSS at 3-month follow-up                            | .36**  | .30**  | -.41** | .41** | -.25** | -.17* |       |
| 8. PTSS at 12-month follow-up                           | .18    | .16    | -.30** | .28** | -.16   | -.05  | .66** |

Note: PTSS: Posttraumatic Stress Symptoms; \* $p < .05$ ; \*\* $p < .01$

### Crosstabs for PTSS

Crosstabs were run to test if there were differences between the obtained clusters with clinically significant PTSS (according to a 10-point cut-off score). Given that the chi-square was significant at 3-month ( $X^2 = 18.25$ ;  $p < .001$ ; effect size (Cohen's  $d$ ) = 1.54) and at 12-month follow-up ( $X^2 = 6.93$ ;  $p < .05$ ; effect size (Cohen's  $d$ ) = 1.52), differences between cluster groups were examined through the analysis of the standardized adjusted residuals (absolute values higher than 1.96 are indicative of significant differences). The obtained results (see Supplementary Table 1) show that the highest number of cases with clinically significant PTSS was found in the High Risk profile (cluster 3). By contrast, a high proportion of cases without significant PTSS were found in the Low Risk profile (cluster 1).

**Table S2.** Crosstab for clinically significant posttraumatic stress disorder symptoms at 3-month follow-up and 12-month follow-up

| Cluster         |                   | Posttraumatic stress symptoms at 3-month follow-up |      |                 | Posttraumatic stress symptoms at 12-month follow-up |      |       |
|-----------------|-------------------|----------------------------------------------------|------|-----------------|-----------------------------------------------------|------|-------|
|                 |                   | no                                                 | yes  | Total           | no                                                  | yes  | Total |
| 1. Low Risk     | Count             | 45                                                 | 16   | 61              | 31                                                  | 12   | 43    |
|                 | Expected count    | 35.1                                               | 25.9 | 61              | 24.9                                                | 18.1 | 43    |
|                 | Adjusted residual | 3.4                                                | -3.4 |                 | 2.5                                                 | -2.5 |       |
| 2. Medium Risk  | Count             | 33                                                 | 27   | 60              | 20                                                  | 19   | 39    |
|                 | Expected count    | 34.5                                               | 25.5 | 60              | 22.6                                                | 16.4 | 39    |
|                 | Adjusted residual | -0.5                                               | 0.5  |                 | -1.1                                                | 1.1  |       |
| 3. High Risk    | Count             | 6                                                  | 19   | 25              | 7                                                   | 11   | 18    |
|                 | Expected count    | 14.4                                               | 10.6 | 25              | 10.4                                                | 7.6  | 18    |
|                 | Adjusted residual | -3.7                                               | 3.7  |                 | -1.8                                                | 1.8  |       |
| Chi-square test | Value             | 18.25                                              |      | Chi-square test | Value                                               | 6.93 |       |
|                 | Df                | 2                                                  |      |                 | Df                                                  | 2    |       |
|                 | p                 | <.001                                              |      |                 | p                                                   | <.05 |       |
